# Supplementary material for: Mutations in the DNA methylation pathway and number of driver mutations predict response to azacitidine in myelodysplastic syndromes
Source: PubMed Central journal article supplement (PMC5739787; doi:10.18632/oncotarget.22157), 2017-10-27
Supplement: oncotarget-08-106948-s001.pdf [file oncotarget-08-106948-s001.pdf]

## **Mutations in the DNA methylation pathway and number of driver mutations predict response to azacitidine in myelodysplastic syndromes**

**Supplementary Table 1: Descriptions of variants analysed and categorized according to cancer mutation databases and algorithms for computational prediction of functional impact of variants**

See Supplementary File 1

**Supplementary File 1: PRISMA Checklist**

See Supplementary File 2

**Supplementary File 2: Supplemental Information**

See Supplementary File 3
